# Supplementary material for: A Three-Year Climatology of the Wind Field Structure at Cape Baranova (Severnaya Zemlya, Siberia) from SODAR Observations and High-Resolution Regional Climate Model Simulations during YOPP
Source: MDPI journal article supplement (doi:10.3390/atmos13060957), 2022-06-12
Supplement: s1 [file s1]

Archive with 1 entries (1 files):
- atmosphere-1707889-supplementary.pdf
